# Supplementary material for: Association of Peripheral Inflammatory Biomarkers and Growth Factors Levels with Sex, Therapy and Other Clinical Factors in Schizophrenia and Patient Stratification Based on These Data
Source: MDPI journal article supplement (doi:10.3390/brainsci13050836), 2023-05-22
Supplement: s1 [file s1]

# Supplement Figures

Article

## Association of Peripheral Inflammatory Biomarkers and Growth Factors Levels with Sex, Therapy and Other Clinical Factors in Schizophrenia and Patient Stratification Based on These Data

Evgeny A. Ermakov <sup>1,2,\*</sup>, Mark M. Melamud <sup>1</sup>, Anastasiia S. Boiko <sup>3</sup>, Daria A. Kamaeva <sup>3</sup>, Svetlana A. Ivanova <sup>3</sup>, Georgy A. Nevinsky <sup>1,2</sup>, and Valentina N. Buneva <sup>1,2</sup>

<sup>1</sup> Institute of Chemical Biology and Fundamental Medicine, Siberian Branch of the Russian Academy of Sciences, 630090 Novosibirsk, Russia

<sup>2</sup> Novosibirsk State University, Department of Natural Sciences, Novosibirsk 630090, Russia

<sup>3</sup> Mental Health Research Institute, Tomsk National Research Medical Center of the Russian Academy of Sciences, 634014 Tomsk, Russia

\* Correspondence: [evgeny\\_ermakov@mail.ru](mailto:evgeny_ermakov@mail.ru)

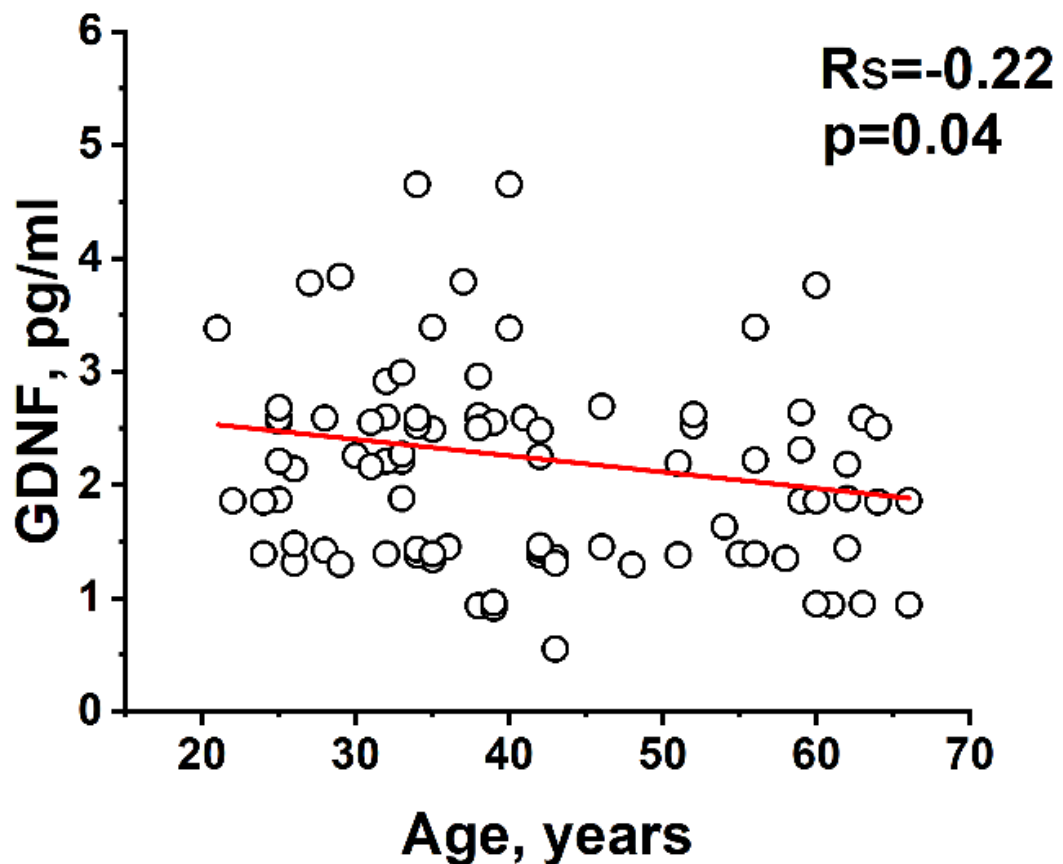

**Figure S1.** Correlation of serum GDNF level with the age of patients with schizophrenia.  $R_s$  is the Spearman correlation coefficient.

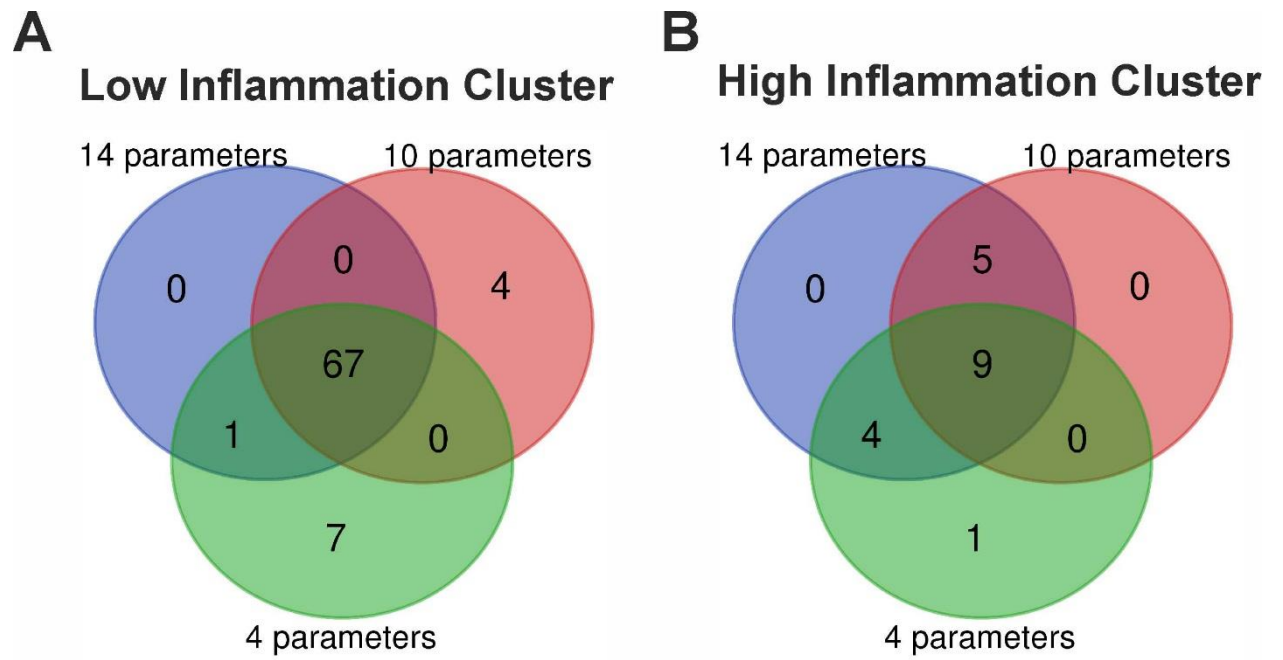

**Figure S2.** Venn diagram showing the number of patients classified to “Low Inflammation Cluster” (A) and “High Inflammation Cluster” (B) when clustered using 14, 10 and 4 parameters (cytokine and growth factor levels).
