# Supplementary material for: Association of Peripheral Inflammatory Biomarkers and Growth Factors Levels with Sex, Therapy and Other Clinical Factors in Schizophrenia and Patient Stratification Based on These Data
Source: Brain Sci. 2023 May 22;13(5):836. doi: 10.3390/brainsci13050836 (PMC10216189; doi:10.3390/brainsci13050836)
Supplement: Supplementary file 1 [file brainsci-13-00836-s001.zip]

Archive with 8 entries (8 files):
- Supplement Figures.pdf
- Supplementary Table S1.xlsx
- Supplementary Table S2.xlsx
- Supplementary Table S3.xlsx
- Supplementary Table S4.xlsx
- Supplementary Table S5.xlsx
- Supplementary Table S6.xlsx
- Supplementary Table S7.xlsx
