# Supplementary material for: Association of Peripheral Inflammatory Biomarkers and Growth Factors Levels with Sex, Therapy and Other Clinical Factors in Schizophrenia and Patient Stratification Based on These Data
Source: Brain Sci. 2023 May 22;13(5):836. doi: 10.3390/brainsci13050836 (PMC10216189; doi:10.3390/brainsci13050836)
Supplement: Supplementary file 1 [file brainsci-13-00836-s001.zip › Supplementary Table S1.xlsx]

## Sheet: Лист1
Table S1. Descriptive statistics of cytokine concentrations for the analyzed groups
Analyte	HS Group					SZ Group
	n	Median (Q1 — Q3), pg/ml	Min, pg/ml	Max, pg/ml	Avg±SD, pg/ml	n	Median (Q1 — Q3), pg/ml	Min, pg/ml	Max, pg/ml	Avg±SD, pg/ml	HS vs. SZ, p-value *
IL-1β	38	3.88 (2.14—4.94)	1.59	8.79	3.78±1.62	54	4.92 (3.53—5.89)	1.64	13.98	5.06±1.57	0.005
IL-2	38	7.27 (5.28—7.97)	4.19	11.26	6.9±1.52	53	7.98 (6.35—9.62)	4.23	16.04	8.27±1.97	0.007
IL-4	37	12.58 (9.69—17)	3.33	32.91	14.33±4.87	53	16.99 (12.5—24.02)	7.83	69.29	21.43±9.51	0.004
IL-6	38	1.51 (1.19—2.01)	0.88	3.04	1.61±0.48	54	2.05 (1.72—3.22)	0.91	9.03	2.61±1.08	2.40072e-05
IL-10	37	1.01 (0.8—1.24)	0.59	4.47	1.13±0.36	53	1.12 (0.87—1.46)	0.61	4.5	1.28±0.43	0.11
IL-21	38	13.8 (7.2—22.2)	5.7	116.2	23±17.5	53	13.8 (10.6—25.6)	5.7	158.3	24.7±17.6	0.27
APRIL	39	2162 (1644—3001)	118	4259	2296±706	54	1992 (1702—2631)	799	4280	2188±623	0.49
BAFF	39	482 (423—564)	257	1006	501±89	54	571 (492—728)	335	1484	621±150	0.000837478
PBEF	31	1014 (59—1414)	50	2242	947±495	43	966 (60—1429)	51	5828	1067±748	0.95
IFN-α	38	2.83 (2.25—3.13)	1.53	7.39	3.05±0.91	54	3.25 (2.66—5.25)	1.53	30.93	4.56±245	0.006
TNF-α	38	4.42 (3.53—5.42)	1.23	6.91	4.37±1.08	54	3.62 (2.69—4.45)	2.21	7.88	3.83±1.03	0.02
GM-CSF	38	1.83 (1.23—3.02)	0.53	10.37	2.83±1.83	54	2.98 (1.6—4.32)	0.19	28.63	4.42±3.19	0.02
NRG-1β1	37	13.7 (8.2—47.4)	4.4	286.2	44.4±44.3	54	28.6 (13.6—74.2)	6.4	881	101.2±113	0.02
NGF-β	38	2.94 (2.65—3.45)	1.25	23.35	4.11±2.21	54	2.05 (1.57—3.75)	0.96	42.35	4.83±4.28	0.03
GDNF	38	1.86 (1.38—2.5)	0.93	4.65	1.91±059	53	2.5 (1.44—2.8)	0.55	7.35	2.48±0.83	0.01
Note: Data are presented as a median (Q1 - Q3), pg/ml.
The significance of the differences was calculated using the Mann–Whitney U test.
* Statistically significant differences after Benjamini–Hochberg correction for multiple comparisons are marked in red.
