# Supplementary material for: Association of Peripheral Inflammatory Biomarkers and Growth Factors Levels with Sex, Therapy and Other Clinical Factors in Schizophrenia and Patient Stratification Based on These Data
Source: Brain Sci. 2023 May 22;13(5):836. doi: 10.3390/brainsci13050836 (PMC10216189; doi:10.3390/brainsci13050836)
Supplement: Supplementary file 1 [file brainsci-13-00836-s001.zip › Supplementary Table S2.xlsx]

## Sheet: Лист1
Table S2. Serum cytokine and growth factor levels of patients with schizophrenia depending on the duration of the disease
Analyte	<10 years (n = 15)	>10 years (n = 38)	p-value
IL-1β	4.92 (4.87; 6.49)	4.91 (2.6; 5.66)	0.3
IL-2	7.91 (7.06; 10.41)	7.98 (6.26; 9.55)	0.59
IL-4	17.91 (13.16; 23.37)	16.99 (12.26; 23.28)	0.89
IL-6	2 (1.54; 2.84)	2.16 (1.72; 3.31)	0.42
IL-10	1.05 (0.76; 1.37)	1.15 (0.88; 1.52)	0.38
IL-21	15.32 (10.27; 35.63)	13.78 (9.78; 25.31)	0.6
APRIL	1989 (1443; 2692)	2008 (1741; 2644)	0.41
BAFF	566 (495; 728)	578 (473; 718)	0.72
IFN-α	3.25 (2.7; 5.26)	3.25 (2.51; 5.26)	0.64
TNF-α	3.21 (2.64; 4.16)	3.74 (2.7; 4.65)	0.24
GM-CSF	3.03 (2.23; 4.34)	2.75 (1.56; 3.88)	0.29
NRG-1β1	34.71 (15.83; 76.74)	26.09 (13.41; 80.63)	0.48
NGF-β	2.4 (1.62; 4.32)	1.94 (1.54; 3.75)	0.42
GDNF	2.55 (1.86; 2.99)	2.31 (1.39; 2.63)	0.33
Note: Data are presented as a median (Q1 - Q3), pg/ml.
The significance of the differences was calculated using the Mann–Whitney U test.
