# Supplementary material for: Association of Peripheral Inflammatory Biomarkers and Growth Factors Levels with Sex, Therapy and Other Clinical Factors in Schizophrenia and Patient Stratification Based on These Data
Source: Brain Sci. 2023 May 22;13(5):836. doi: 10.3390/brainsci13050836 (PMC10216189; doi:10.3390/brainsci13050836)
Supplement: Supplementary file 1 [file brainsci-13-00836-s001.zip › Supplementary Table S3.xlsx]

## Sheet: Лист1
Table S3. Serum cytokine and growth factor levels of patients with schizophrenia depending on the duration of antipsychotic therapy
Analyte	< 1 year of therapy (n = 12)	> 1 year of therapy (n = 40)	p-value
Cytokines
IL-1β	4.94 (2.56—6.85)	4.92 (3.55—5.66)	0.92
IL-2	8.31 (5.55—10.2)	7.91 (6.34—9.62)	0.86
IL-4	18.84 (11.61—26.02)	16.99 (12.72—22.52)	0.95
IL-6	2.29 (1.98—3.51)	2.02 (1.59—3.19)	0.27
IL-10	1.13 (0.78—1.4)	1.12 (0.97—1.52)	0.63
IL-21	13.12 (7.57—38.69)	13.78 (10.87—24.16)	0.71
APRIL	1795 (1433—2090)	2130 (1766—2719)	0.09
BAFF	549 (496—728)	578 (478—735)	0.88
IFN-α	3.09 (2—5.58)	3.25 (2.67—5.13)	0.66
TNF-α	4.12 (2.66—4.93)	3.58 (2.69—4.45)	0.63
Growth/neurotrophic factors
GM-CSF	3 (1.83—5.39)	2.73 (1.57—3.73)	0.39
NRG-1β1	20.39 (8.81—278.71)	32.25 (15.88—75.91)	0.39
NGF-β	1.93 (1.55—5.68)	2.05 (1.56—3.67)	0.9
GDNF	0.45 (0.34—0.61)	0.55 (0.44—0.85)	0.71
Note: Data are presented as a median (Q1 - Q3), pg/ml.
The significance of the differences was calculated using the Mann–Whitney U test.
