# Supplementary material for: Association of Peripheral Inflammatory Biomarkers and Growth Factors Levels with Sex, Therapy and Other Clinical Factors in Schizophrenia and Patient Stratification Based on These Data
Source: Brain Sci. 2023 May 22;13(5):836. doi: 10.3390/brainsci13050836 (PMC10216189; doi:10.3390/brainsci13050836)
Supplement: Supplementary file 1 [file brainsci-13-00836-s001.zip › Supplementary Table S4.xlsx]

## Sheet: Лист1
Table S4. Serum cytokine and growth factor levels of patients with schizophrenia depending on response to therapy
Variable	PRS patients (n = 43)		TRS patients (n = 9)		p-value
Cytokines
IL-1β	4.92 (3.57—5.71)		4.2 (3.02—6.07)		0.6
IL-2	7.91 (6.37—9.62)		7.53 (5.55—9.31)		0.64
IL-4	17.92 (12.53—22.49)		15.27 (12.49—31.15)		0.95
IL-6	2.02 (1.75—3.19)		3.04 (1.52—3.31)		0.76
IL-10	1.1 (0.88—1.38)		1.39 (0.88—2)		0.31
IL-21	12.96 (10.27—23.43)		19.98 (11.23—53.89)		0.18
APRIL	1995 (1705—2610)		1963 (1699—3552)		0.79
BAFF	577 (485—728)		548 (481—776)		0.91
IFN-α	3.25 (2.51—5.26)		3.47 (2.95—5.44)		0.45
TNF-α	3.64 (2.69—4.46)		3.59 (2.69—4.59)		0.93
Growth/neurotrophic factors
GM-CSF	2.97 (1.59—3.69)		2.49 (1.69—6.12)		0.8
NRG-1β1	24.97 (13.41—65.55)		55.12 (20.35—227.57)		0.24
NGF-β	2.03 (1.54—3.63)		3.34 (1.65—6.69)		0.28
GDNF	2.52 (1.45—2.75)		2.25 (1.39—2.97)		0.55
Demographic and Clinical Characteristics
Age, years	39 (33—52)		40 (33.5—45)		0.92
Duration, years	15 (7—20)		16 (13.5—17)		0.75
PANSS, positive score	18 (13—25)		15 (10.5—24.5)		0.53
PANSS, negative score	22 (17—27)		25 (16—28)		0.67
PANSS, general score	37 (32—55)		49 (28—55)		0.89
PANSS, total score	77 (64—106)		92 (57.5—109.5)		0.88
Total CPZeq	299.5 (168—412.5)		875 (798—1100)		7e-06
Note: Data are presented as a median (Q1 - Q3), pg/ml.
The significance of the differences was calculated using the Mann–Whitney U test.
Abbreviations: PRS - partially responsive schizophrenia, TRS - treatment-resistant schizophrenia, PANSS - Positive and Negative Syndrome Scale, CPZeq - chlorpromazine equivalents.
* p-values < 0.05 are marked in red.
