# Supplementary material for: Association of Peripheral Inflammatory Biomarkers and Growth Factors Levels with Sex, Therapy and Other Clinical Factors in Schizophrenia and Patient Stratification Based on These Data
Source: Brain Sci. 2023 May 22;13(5):836. doi: 10.3390/brainsci13050836 (PMC10216189; doi:10.3390/brainsci13050836)
Supplement: Supplementary file 1 [file brainsci-13-00836-s001.zip › Supplementary Table S5.xlsx]

## Sheet: Лист1
Table S5. Descriptive statistics for various parameters in Low and High Inflammation Clusters
Variable	Low Inflammation Cluster	High Inflammation Cluster	p-value *
IL-1β	4.185	6.86	5.09978e-10
IL-2	7.27	10.395	4.49796e-09
IL-4	12.97	32.91	2.02989e-12
IL-6	1.735	2.91	3.96764e-05
IL-10	1.02	1.285	0.0495788
IL-21	12.315	38.205	4.95496e-09
APRIL	2072	1943.5	0.457499
BAFF	501.345	652.005	0.000716295
IFN-α	2.855	5.675	9.55947e-15
TNF-α	3.675	4.435	0.0259868
GM-CSF	1.87	6.485	3.5653e-16
NRG-1β1	17.365	89.165	5.18598e-06
NGF-β	2.415	5.32	6.04057e-08
GDNF	1.86	3.385	2.4861e-09
Age	38.5	36	0.490115
Age at disease manifestation	25.5	25	0.762178
Duration of the disease	15.5	16.5	0.613743
PANSS, positive score	17	17	0.613743
PANSS, negative score	22	18	0.255041
PANSS, general score	42.5	33.5	0.100051
PANSS, total score	82	66	0.178896
Total CPZeq	300	279.5	0.93288
Note: Data are presented as a median value.
The significance of the differences was calculated using the Mann–Whitney U test.
* Statistically significant differences are marked in red.
