# Supplementary material for: Association of Peripheral Inflammatory Biomarkers and Growth Factors Levels with Sex, Therapy and Other Clinical Factors in Schizophrenia and Patient Stratification Based on These Data
Source: Brain Sci. 2023 May 22;13(5):836. doi: 10.3390/brainsci13050836 (PMC10216189; doi:10.3390/brainsci13050836)
Supplement: Supplementary file 1 [file brainsci-13-00836-s001.zip › Supplementary Table S6.xlsx]

## Sheet: Лист1
Table S6. Results of Kruskal–Wallis ANOVA test followed by Dunn’s post hoc test for multiple comparisons.
Variable	Comparison groups	Mean Rank Diff	Z	Prob	Sig
TNF-alpha	HS_High_Claster vs. HS_Low_Claster	10.75	0.89138	1	0
	HS_High_Claster vs. SZ_Low_Claster	28.8658	2.43034	0.09051	0
	HS_High_Claster vs. SZ_High_Claster	8.56923	0.65223	1	0
	HS_Low_Claster vs. SZ_Low_Claster	18.1158	2.97096	0.01781	1
	HS_Low_Claster vs. SZ_High_Claster	-2.18077	-0.26306	1	0
	SZ_Low_Claster vs. SZ_High_Claster	-20.2966	-2.53013	0.06841	0
IL-6	HS_High_Claster vs. HS_Low_Claster	26.3167	2.18258	0.1744	0
	HS_High_Claster vs. SZ_Low_Claster	7.95526	0.66992	1	0
	HS_High_Claster vs. SZ_High_Claster	-13.8615	-1.05526	1	0
	HS_Low_Claster vs. SZ_Low_Claster	-18.3614	-3.01183	0.01558	1
	HS_Low_Claster vs. SZ_High_Claster	-40.1782	-4.84748	7.50244e-06	1
	SZ_Low_Claster vs. SZ_High_Claster	-21.8168	-2.72017	0.03915	1
PBEF	HS_High_Claster vs. HS_Low_Claster	5.625	0.51918	1	0
	HS_High_Claster vs. SZ_Low_Claster	9.575	0.89667	1	0
	HS_High_Claster vs. SZ_High_Claster	-4.67045	-0.39873	1	0
	HS_Low_Claster vs. SZ_Low_Claster	3.95	0.71896	1	0
	HS_Low_Claster vs. SZ_High_Claster	-10.2955	-1.40947	0.95219	0
	SZ_Low_Claster vs. SZ_High_Claster	-14.2454	-2.01457	0.2637	0
IL-10	HS_High_Claster vs. HS_Low_Claster	5.13333	0.4257	1	0
	HS_High_Claster vs. SZ_Low_Claster	-0.09211	-0.00776	1	0
	HS_High_Claster vs. SZ_High_Claster	-14.8846	-1.13306	1	0
	HS_Low_Claster vs. SZ_Low_Claster	-5.22544	-0.85707	1	0
	HS_Low_Claster vs. SZ_High_Claster	-20.0179	-2.41498	0.09442	0
	SZ_Low_Claster vs. SZ_High_Claster	-14.7925	-1.84424	0.39089	0
IL-2	HS_High_Claster vs. HS_Low_Claster	33.1167	2.7458	0.03622	1
	HS_High_Claster vs. SZ_Low_Claster	23.9632	2.01742	0.26191	0
	HS_High_Claster vs. SZ_High_Claster	-9.53077	-0.72537	1	0
	HS_Low_Claster vs. SZ_Low_Claster	-9.15351	-1.50105	0.80005	0
	HS_Low_Claster vs. SZ_High_Claster	-42.6474	-5.14401	1.61365e-06	1
	SZ_Low_Claster vs. SZ_High_Claster	-33.4939	-4.17498	0.000178803	1
beta-NGF	HS_High_Claster vs. HS_Low_Claster	30.1667	2.50137	0.07423	0
	HS_High_Claster vs. SZ_Low_Claster	51.1184	4.30387	0.000100704	1
	HS_High_Claster vs. SZ_High_Claster	12.5	0.95141	1	0
	HS_Low_Claster vs. SZ_Low_Claster	20.9518	3.43603	0.00354	1
	HS_Low_Claster vs. SZ_High_Claster	-17.6667	-2.13104	0.19851	0
	SZ_Low_Claster vs. SZ_High_Claster	-38.6184	-4.81407	8.8734e-06	1
IL-4	HS_High_Claster vs. HS_Low_Claster	35.7667	2.96573	0.01812	1
	HS_High_Claster vs. SZ_Low_Claster	24.2579	2.04238	0.24668	0
	HS_High_Claster vs. SZ_High_Claster	-13.8615	-1.05505	1	0
	HS_Low_Claster vs. SZ_Low_Claster	-11.5088	-1.88742	0.35462	0
	HS_Low_Claster vs. SZ_High_Claster	-49.6282	-5.98643	1.28699e-08	1
	SZ_Low_Claster vs. SZ_High_Claster	-38.1194	-4.75189	1.20917e-05	1
APRIL	HS_High_Claster vs. HS_Low_Claster	1.66667	0.13818	1	0
	HS_High_Claster vs. SZ_Low_Claster	1.46842	0.12362	1	0
	HS_High_Claster vs. SZ_High_Claster	9.06154	0.68963	1	0
	HS_Low_Claster vs. SZ_Low_Claster	-0.19825	-0.03251	1	0
	HS_Low_Claster vs. SZ_High_Claster	7.39487	0.89192	1	0
	SZ_Low_Claster vs. SZ_High_Claster	7.59312	0.94644	1	0
BAFF	HS_High_Claster vs. HS_Low_Claster	18.6333	1.54485	0.7343	0
	HS_High_Claster vs. SZ_Low_Claster	2.94474	0.2479	1	0
	HS_High_Claster vs. SZ_High_Claster	-16.5462	-1.25922	1	0
	HS_Low_Claster vs. SZ_Low_Claster	-15.6886	-2.57256	0.06057	0
	HS_Low_Claster vs. SZ_High_Claster	-35.1795	-4.24298	0.00013234	1
	SZ_Low_Claster vs. SZ_High_Claster	-19.4909	-2.42937	0.09075	0
GM-CSF	HS_High_Claster vs. HS_Low_Claster	50.1	4.15407	0.000195965	1
	HS_High_Claster vs. SZ_Low_Claster	42.2684	3.55863	0.00224	1
	HS_High_Claster vs. SZ_High_Claster	4.93846	0.37587	1	0
	HS_Low_Claster vs. SZ_Low_Claster	-7.83158	-1.28432	1	0
	HS_Low_Claster vs. SZ_High_Claster	-45.1615	-5.44743	3.06618e-07	1
	SZ_Low_Claster vs. SZ_High_Claster	-37.33	-4.6533	1.96002e-05	1
NRG1 beta1	HS_High_Claster vs. HS_Low_Claster	33.7833	2.80122	0.03055	1
	HS_High_Claster vs. SZ_Low_Claster	24.9921	2.10416	0.21219	0
	HS_High_Claster vs. SZ_High_Claster	0.47692	0.0363	1	0
	HS_Low_Claster vs. SZ_Low_Claster	-8.79123	-1.44172	0.89629	0
	HS_Low_Claster vs. SZ_High_Claster	-33.3064	-4.01753	0.000352871	1
	SZ_Low_Claster vs. SZ_High_Claster	-24.5152	-3.05595	0.01346	1
IL-1beta	HS_High_Claster vs. HS_Low_Claster	44.55	3.6949	0.00132	1
	HS_High_Claster vs. SZ_Low_Claster	32.3237	2.72212	0.03892	1
	HS_High_Claster vs. SZ_High_Claster	1.83077	0.13938	1	0
	HS_Low_Claster vs. SZ_Low_Claster	-12.2263	-2.00557	0.26941	0
	HS_Low_Claster vs. SZ_High_Claster	-42.7192	-5.15425	1.52792e-06	1
	SZ_Low_Claster vs. SZ_High_Claster	-30.4929	-3.80208	0.000860926	1
IFN-alpha	HS_High_Claster vs. HS_Low_Claster	47.7	3.95618	0.000456952	1
	HS_High_Claster vs. SZ_Low_Claster	37.4053	3.15008	0.00979	1
	HS_High_Claster vs. SZ_High_Claster	0.87692	0.06676	1	0
	HS_Low_Claster vs. SZ_Low_Claster	-10.2947	-1.68873	0.54763	0
	HS_Low_Claster vs. SZ_High_Claster	-46.8231	-5.64942	9.65949e-08	1
	SZ_Low_Claster vs. SZ_High_Claster	-36.5283	-4.55464	3.14852e-05	1
IL-21	HS_High_Claster vs. HS_Low_Claster	39.2	3.25038	0.00691	1
	HS_High_Claster vs. SZ_Low_Claster	36.3263	3.05845	0.01335	1
	HS_High_Claster vs. SZ_High_Claster	3.8	0.28923	1	0
	HS_Low_Claster vs. SZ_Low_Claster	-2.87368	-0.47127	1	0
	HS_Low_Claster vs. SZ_High_Claster	-35.4	-4.2701	0.000117229	1
	SZ_Low_Claster vs. SZ_High_Claster	-32.5263	-4.05462	0.000301293	1
GDNF	HS_High_Claster vs. HS_Low_Claster	39.85	3.30515	0.0057	1
	HS_High_Claster vs. SZ_Low_Claster	29.0184	2.44381	0.0872	0
	HS_High_Claster vs. SZ_High_Claster	-2.13846	-0.16281	1	0
	HS_Low_Claster vs. SZ_Low_Claster	-10.8316	-1.77681	0.45359	0
	HS_Low_Claster vs. SZ_High_Claster	-41.9885	-5.06617	2.43537e-06	1
	SZ_Low_Claster vs. SZ_High_Claster	-31.1569	-3.88494	0.000614132	1
IL-10/IL-6	HS_High_Claster vs. HS_Low_Claster	-22.3	-1.84884	0.38689	0
	HS_High_Claster vs. SZ_Low_Claster	-9.97895	-0.84006	1	0
	HS_High_Claster vs. SZ_High_Claster	-4.70769	-0.35827	1	0
	HS_Low_Claster vs. SZ_Low_Claster	12.321	2.02035	0.26008	0
	HS_Low_Claster vs. SZ_High_Claster	17.5923	2.12179	0.20313	0
	SZ_Low_Claster vs. SZ_High_Claster	5.27126	0.65701	1	0
Age	HS_High_Claster vs. HS_Low_Claster	-19.4	-1.60964	0.64486	0
	HS_High_Claster vs. SZ_Low_Claster	-19.1684	-1.6149	0.638	0
	HS_High_Claster vs. SZ_High_Claster	-20.2615	-1.54315	0.73676	0
	HS_Low_Claster vs. SZ_Low_Claster	0.23158	0.038	1	0
	HS_Low_Claster vs. SZ_High_Claster	-0.86154	-0.10399	1	0
	SZ_Low_Claster vs. SZ_High_Claster	-1.09312	-0.13635	1	0
