# Supplementary material for: Association of Peripheral Inflammatory Biomarkers and Growth Factors Levels with Sex, Therapy and Other Clinical Factors in Schizophrenia and Patient Stratification Based on These Data
Source: Brain Sci. 2023 May 22;13(5):836. doi: 10.3390/brainsci13050836 (PMC10216189; doi:10.3390/brainsci13050836)
Supplement: Supplementary file 1 [file brainsci-13-00836-s001.zip › Supplementary Table S7.xlsx]

## Sheet: Лист1
Table S7. Significance of differences in median levels of cytokines and growth factors in males and females in Low and High Inflammation Clusters
Variable	Male			Female
	Low Inflammation Cluster (n = 23)	High Inflammation Cluster (N = 8)	p-value	Low Inflammation Cluster (n = 45)	High Inflammation Cluster (n = 10)	p-value
IL-1β	2.57	6.865	2.43385e-05	4.89	6.85	1.0745e-05
IL-2	6.4	9.95	0.000827003	7.78	10.395	6.35517e-07
IL-4	12.52	27.7	0.000117383	13.36	32.91	9.50471e-09
IL-6	1.53	2.515	0.0134671	1.75	3.04	0.0011711
IL-10	1.15	1.14	0.947127	1	1.365	0.014225
IL-21	8.7	29.775	3.44796e-05	12.34	45.9	1.93845e-05
APRIL	2162	2117.5	0.982362	2003	1755.5	0.304977
BAFF	501.33	619.13	0.0232043	501.36	688.725	0.0151923
PBEF	1401	1601.77	0.407784	1002	1583	0.0606861
IFN-α	2.5	5.675	4.817e-06	2.89	5.66	4.58141e-09
TNF-α	4.46	4.98	0.171979	3.24	3.985	0.109584
GM-CSF	1.6	7.61	1.77468e-06	1.9	5.4	6.83792e-11
NRG-1β1	10.95	77.41	0.00224244	20.43	108.67	0.000361676
NGF-β	2.86	5.715	0.00384118	1.99	4.325	4.10877e-06
GDNF	1.48	2.985	0.00125343	2.18	3.39	7.77472e-08
IL-10/IL-6	0.711538	0.49243	0.066791	0.546448	0.469867	0.43159
Note: Data are presented as a median value.
The significance of the differences was calculated using the Mann–Whitney U test.
* Statistically significant differences are marked in red.
